# Supplementary material for: Synthesis, characterization, and application of reversible PDLLA-PEG-PDLLA copolymer thermogels in vitro and in vivo
Source: PubMed Central journal article supplement (PMC4707506; doi:10.1038/srep19077), 2016-01-11
Supplement: srep19077-s1.pdf [file srep19077-s1.pdf]

# SUPPORTING INFORMATION

## **Synthesis, characterization, and application of reversible**

### **PDLLA-PEG-PDLLA copolymer thermogels *in vitro* and *in vivo***

Kun Shi , Ya-Li Wang, Ying Qu, Jin-Feng Liao, Bing-Yang Chu, Hua-Ping Zhang,

Feng Luo, Zhi-Yong Qian \*

*State Key Laboratory of Biotherapy and Cancer Center, West China Hospital,  
Sichuan University, and Collaborative Innovation Center for Biotherapy, Chengdu,  
610041, China*

#### **The file includes:**

Figuer S1. <sup>1</sup>H-NMR spectrum of PDLLA-PEG-PDLLA copolymer.

Figure S2. H&E staining of major organs after dorsal subcutaneous administration of PDLLA-PEG-PDLLA hydrogel for 8 weeks (×200).

Table S1. The synthesis of copolymers in this study

---

\* Qian ZY is the corresponding author for this work. Tel/Fax: +86-28-85501986, E-mail: [anderson-qian@163.com](mailto:anderson-qian@163.com) and [zhiyongqian@scu.edu.cn](mailto:zhiyongqian@scu.edu.cn).

SUPPLEMENTARY FIGURES

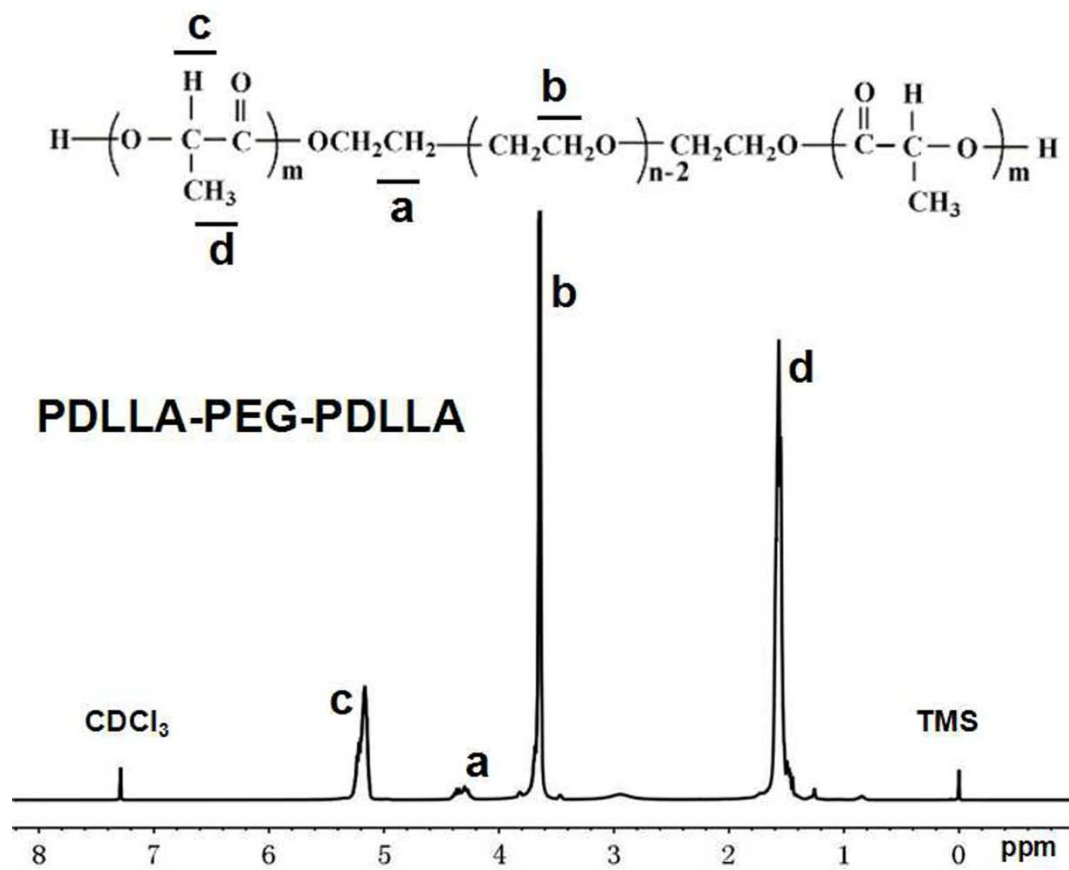

**Figure S1.**  $^1\text{H}$ -NMR spectrum of PDLLA-PEG-PDLLA copolymer.

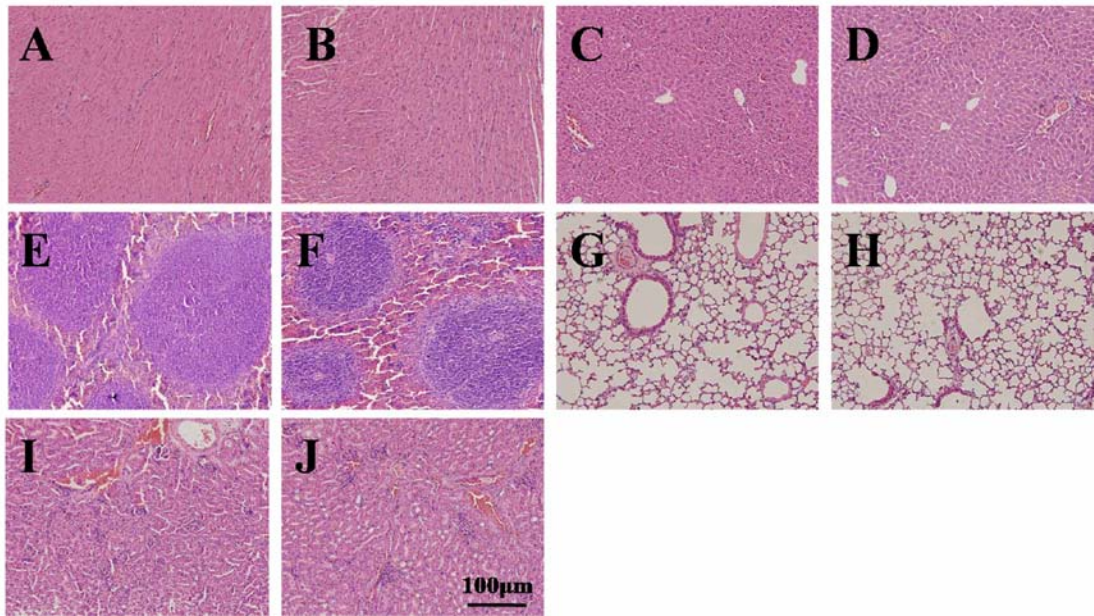

**Figure S2.** HE-staining of major organs after dorsal subcutaneous administration of PDLLA-PEG-PDLLA hydrogel for 8 weeks ( $\times 200$ ). Mice heart, liver, spleen, lung and kidneys of control group (A, C, E, G, I) and hydrogel-treated group (B, D, F, H, J) respectively. The images was representative of  $n = 3$ .

## SUPPLEMENTARY TABLES

**Table S1:** The synthesis of copolymers in this study

| code | Copolymers                                              | Feeding amounts |                    |                             | Solvent         | Precipitant       | Yield |
|------|---------------------------------------------------------|-----------------|--------------------|-----------------------------|-----------------|-------------------|-------|
|      |                                                         | PEG<br>(g)      | D,L-lactide<br>(g) | Sn(Oct) <sub>2</sub><br>(g) | ethanol<br>(ml) | n-pentane<br>(ml) | %     |
| S1   | L <sub>1000</sub> -E <sub>1000</sub> -L <sub>1000</sub> | 20.00           | 40.00              | 0.18                        | 60              | 600               | 91.5  |
| S2   | L <sub>1300</sub> -E <sub>1500</sub> -L <sub>1300</sub> | 20.00           | 34.67              | 0.16                        | 55              | 550               | 92.4  |
| S3   | L <sub>1500</sub> -E <sub>1500</sub> -L <sub>1500</sub> | 20.00           | 40.00              | 0.18                        | 60              | 600               | 93.2  |
| S4   | L <sub>1700</sub> -E <sub>1500</sub> -L <sub>1700</sub> | 20.00           | 45.33              | 0.20                        | 65              | 650               | 92.5  |
| S5   | L <sub>2000</sub> -E <sub>2000</sub> -L <sub>2000</sub> | 20.00           | 40.00              | 0.18                        | 60              | 600               | 91.6  |
| S6   | L <sub>1000</sub> -E <sub>2000</sub> -L <sub>1000</sub> | 20.00           | 20.00              | 0.12                        | 40              | 400               | 93.7  |
| PCEC | C <sub>1000</sub> -E <sub>1000</sub> -C <sub>1000</sub> | 20.00           | 40.00              | 0.18                        | 60              | 600               | 90.8  |
